# Supplementary material for: Back Interface Passivation for Efficient Low-Bandgap Perovskite Solar Cells and Photodetectors
Source: MDPI journal article supplement (doi:10.3390/nano12122065), 2022-06-15
Supplement: s1 [file s1]

## Supplementary information

Article

# Back Interface Passivation for Efficient Low-Bandgap Perovskite Solar Cells and Photodetectors

Jiayu Lu <sup>1,†</sup>, Huayang Wang <sup>1,†</sup>, Tingbing Fan <sup>1</sup>, Dong Ma <sup>2,\*</sup>, Changlei Wang <sup>1,\*</sup>, Shaolong Wu <sup>1,\*</sup> and Xiaofeng Li <sup>1</sup>

<sup>1</sup> Collaborative Innovation Center of Suzhou Nano Science and Technology, Key Lab of Advanced Optical Manufacturing Technologies of Jiangsu Province & Key Lab of Modern Optical Technologies of Education Ministry of China, School of Optoelectronic Science and Engineering, Soochow University, Suzhou 215006, China; 20205239017@stu.suda.edu.cn (J.L.); 20204239018@stu.suda.edu.cn (H.W.); 20204239018@stu.suda.edu.cn (T.F.); xfli@suda.edu.cn (X.L.)

<sup>2</sup> School of Rail Transportation, Soochow University, Suzhou 215137, China

\* Correspondence: madong@suda.edu.cn (D.M.); cl.wang@suda.edu.cn (C.W.); shaolong\_wu@suda.edu.cn (S.W.)

† These authors contributed equally to this work.

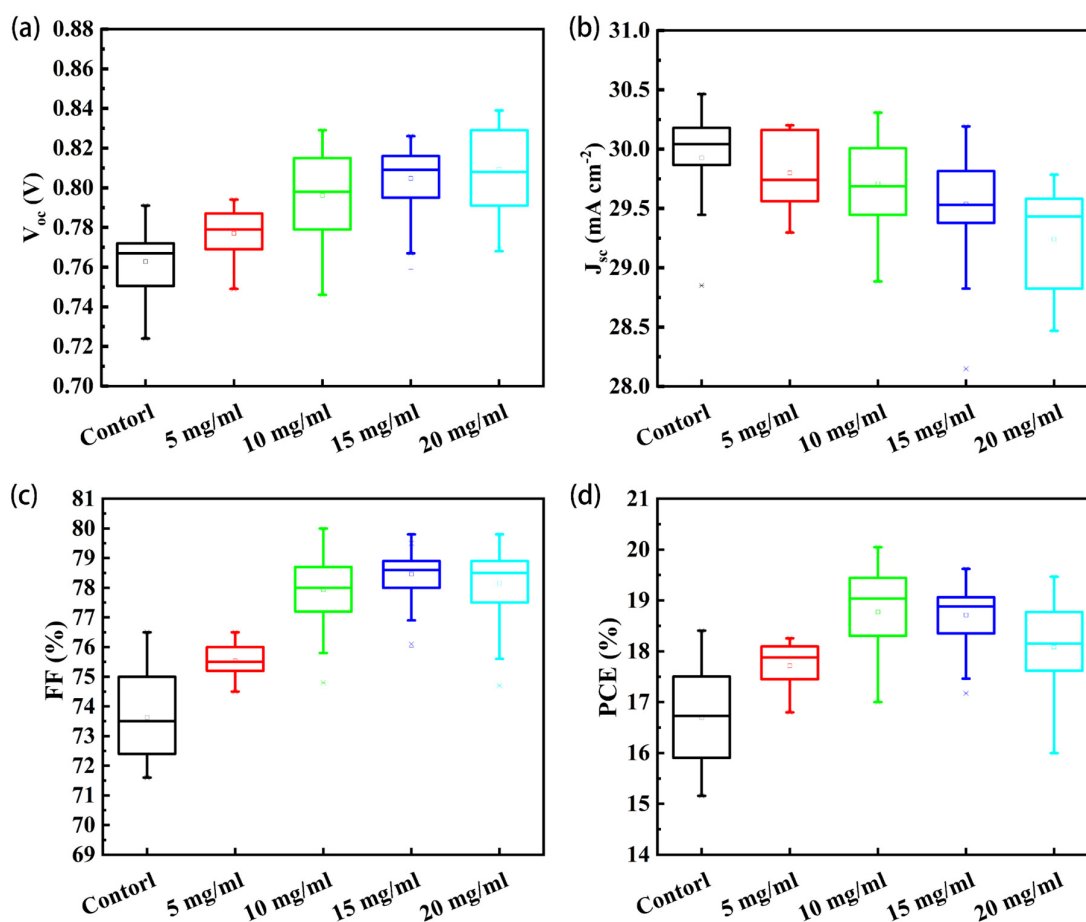

**Figure S1.** Photovoltaic parameters of the perovskite solar cells based on different concentrations of PCBM solution including control (0 mg/mL), 5 mg/mL, 10 mg/mL and 20 mg/mL. (a-d)  $V_{oc}$ ,  $J_{sc}$ , FF, and

PCE statistical chart for the devices with the structure of glass/ITO/PEDOT:PSS/Perovskite/PCBM/C<sub>60</sub>/BCP/Ag.

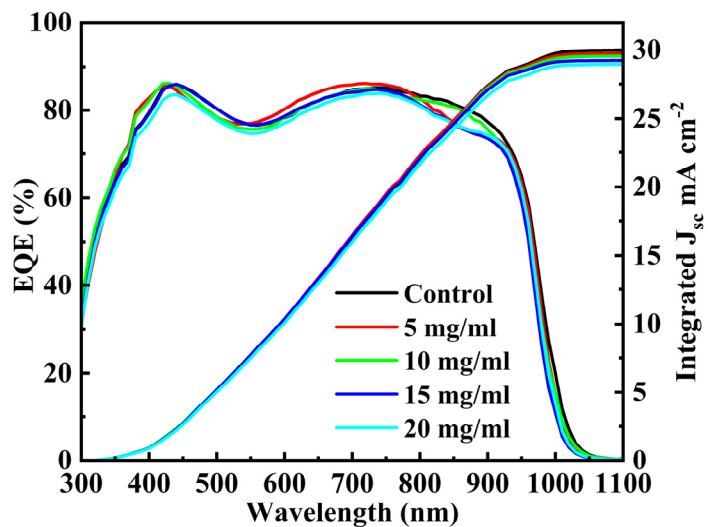

**Figure S2.** EQE curves of the perovskite solar cells based on different concentrations of PCBM solution. With an increase of concentration, the integrated current density is 29.98  $\text{mA cm}^{-2}$ , 29.74  $\text{mA cm}^{-2}$ , 29.57  $\text{mA cm}^{-2}$ , 29.25  $\text{mA cm}^{-2}$  and 28.97  $\text{mA cm}^{-2}$ , respectively.

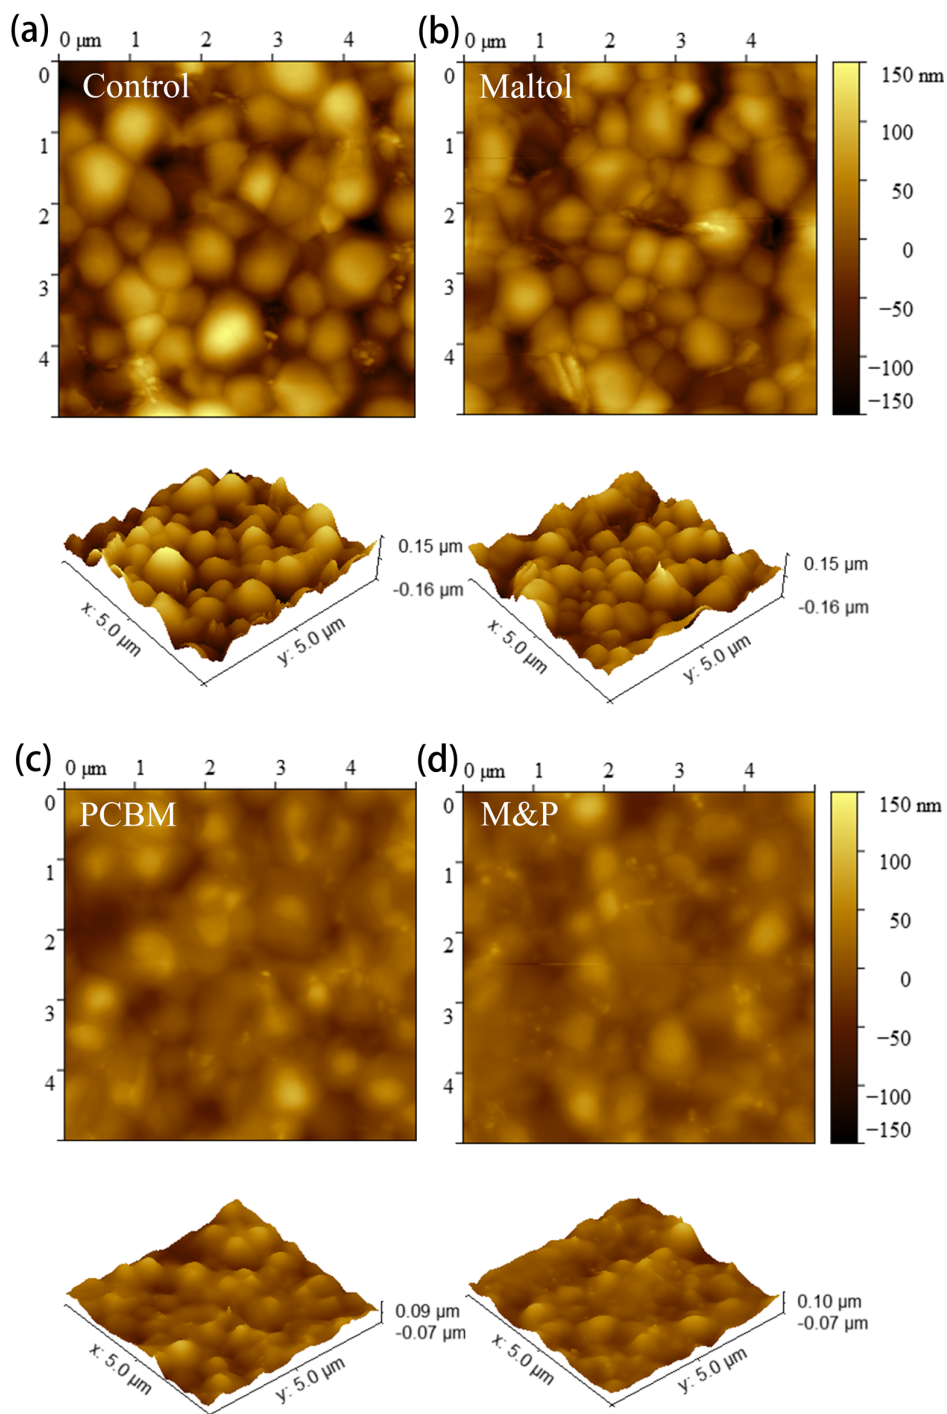

**Figure S3.** AFM images of the perovskite surfaces based on the four different structures involving (a) Control (Glass/ITO /PEDOT/Perovskite), (b) Maltol (Glass/ITO/PEDOT:PSS/Perovskite/Maltol), (c) PCBM (Glass/ITO/PEDOT:PSS /Perovskite/PCBM), (d) M&P (Glass/ITO/PEDOT:PSS/Perovskite/ Maltol/PCBM).

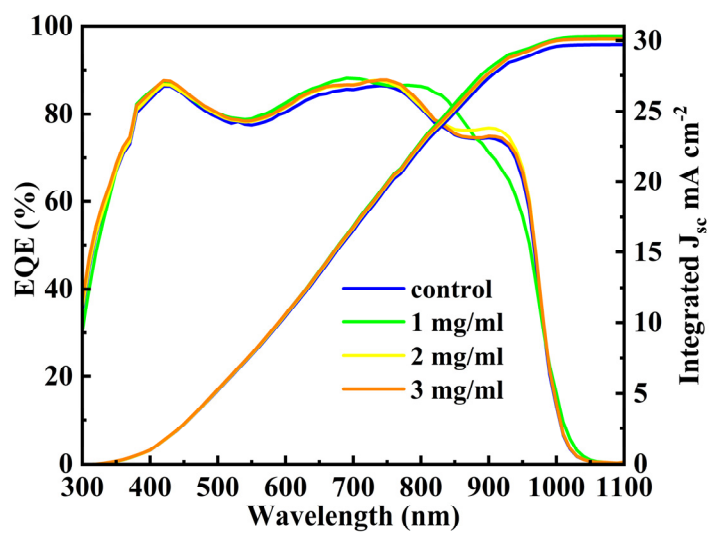

**Figure S4.** EQE curves of the perovskite solar cells with various maltol concentrations (0 mg/mL, 1 mg/mL, 2 mg/mL, 3 mg/mL), the integrated current density is respectively 29.72 mA cm<sup>-2</sup>, 30.28 mA cm<sup>-2</sup>, 30.11 mA cm<sup>-2</sup>, 30.12 mA cm<sup>-2</sup> with the increasing Maltol concentration.

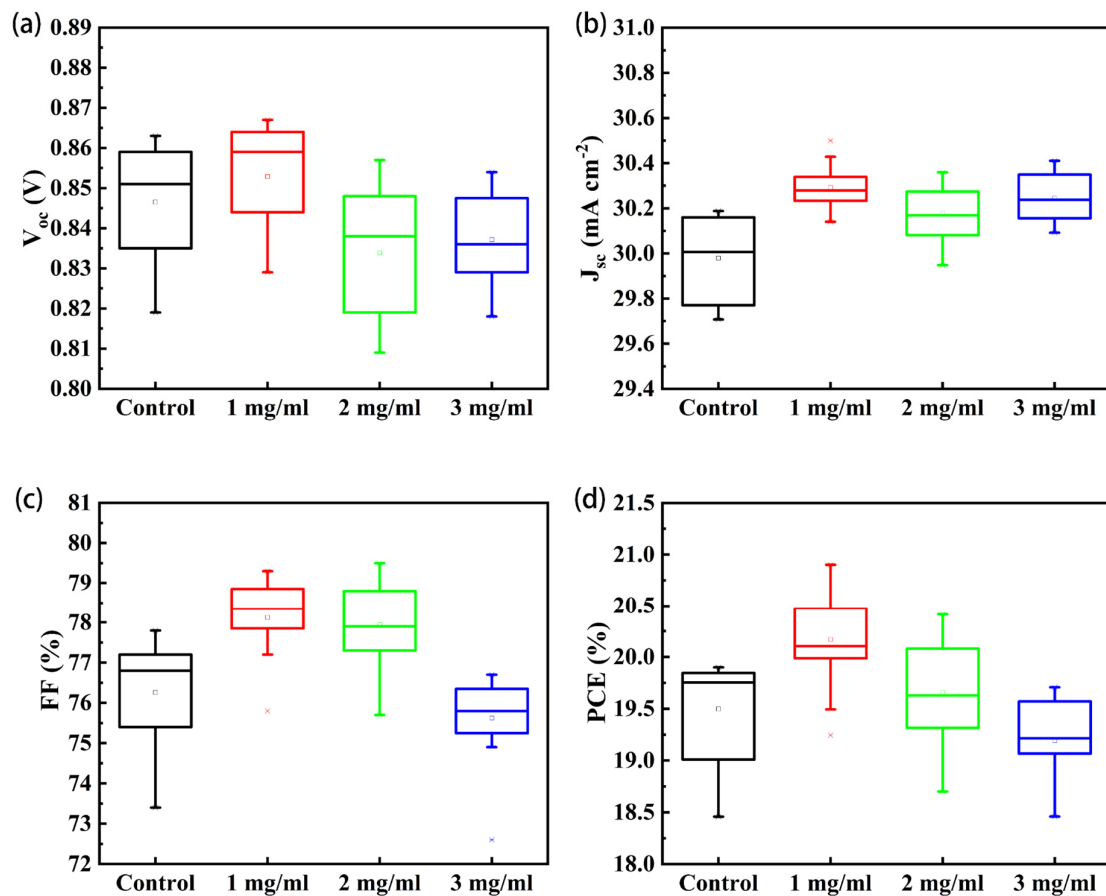

**Figure S5.** Photovoltaic performance of perovskite solar cells with various maltol concentrations involving control (0mg/mL), 1 mg/mL, 2 mg/mL, and 3 mg/mL, based on the device structure of Glass/ITO/PEDOT:PSS/Perovskite/Maltol/PCBM/C60/BCP/Ag. (a-d)  $V_{oc}$ ,  $J_{sc}$ , FF, and PCE, respectively.

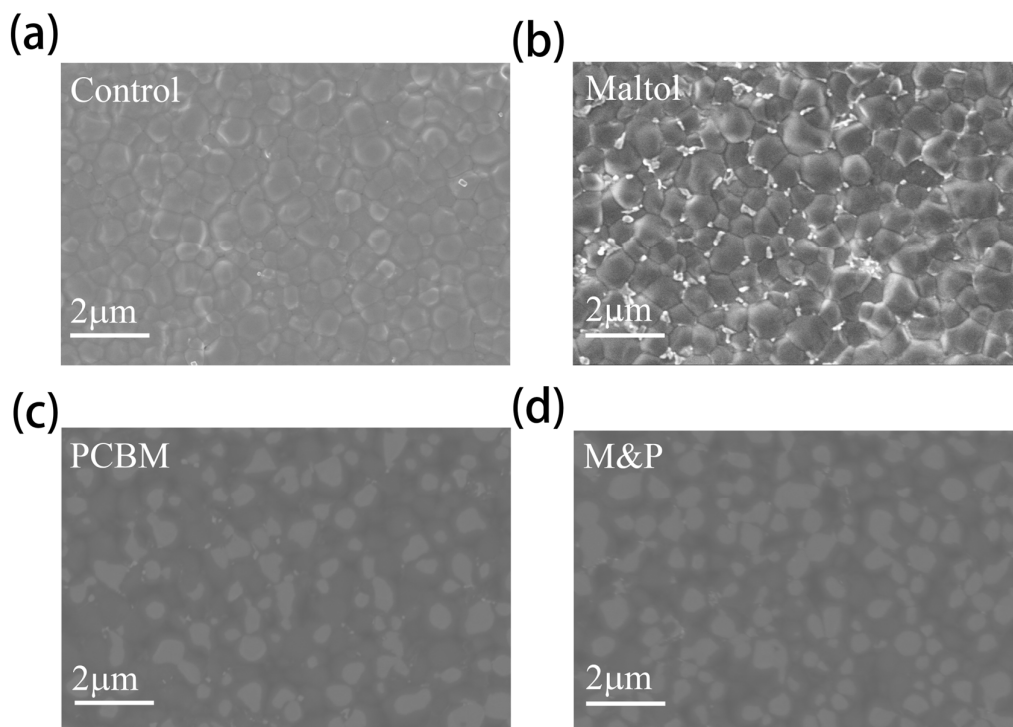

**Figure S6.** SEM images of the different device surfaces with (a) control, (b) maltol, (c) PCBM, and (d) M&P.

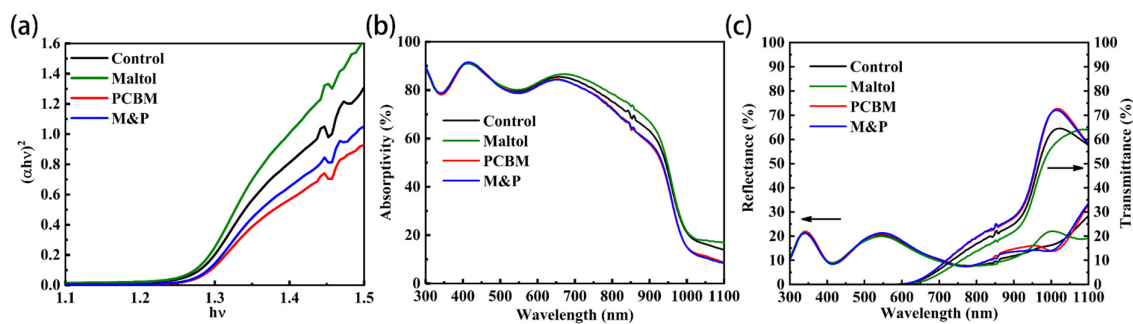

**Figure S7.** (a) Optical bandgap, (b) absorptivity curves, and (c) reflectance & transmittance curves of the four different structures, including Glass/ITO/PEDOT/Perovskite (Control), Glass/ITO/PEDOT/Perovskite/PCBM (PCBM), Glass/ITO/PEDOT/Perovskite/Maltol (Maltol) and Glass/ITO/PEDOT/Perovskite/Maltol/PCBM (M&P). The bandgap of Perovskite is between 1.25 eV and 1.26 eV uninfected by the structure variation.

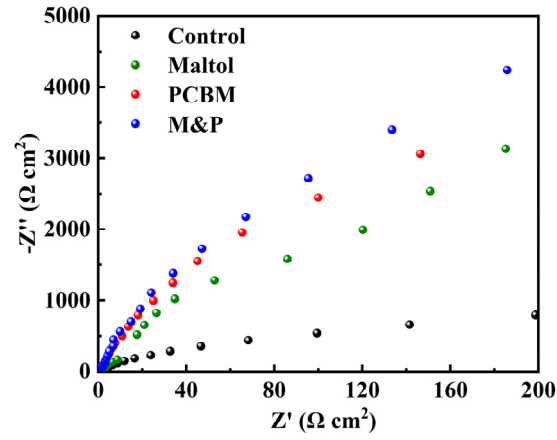

**Figure S8.** Nyquist plots of the four different PSCs under high frequency in the start stage of measurement.

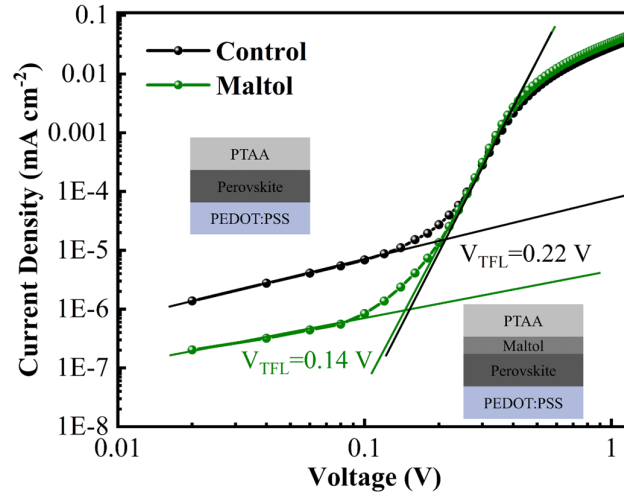

**Figure S9.** SCLC measurement of the control and target devices with hole-only device structure as shown in the inset (Glass/ITO/PEDOT:PSS/Perovskite/PTAA/Cu and Glass/ITO/PEDOT:PSS/Perovskite/Maltol/PTAA/Cu). Maltol is spin coated between perovskite and PTAA layers. The trap-filled limit voltage ( $V_{TFL}$ ) of control device and maltol-based device are 0.22 V and 0.14 V, respectively.

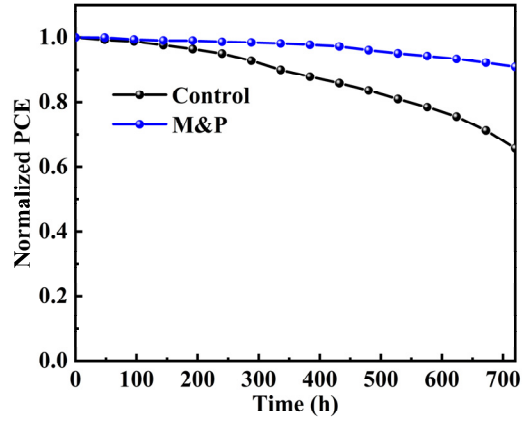

**Figure S10.** PCE evolution of the unencapsulated control and M&P devices in glovebox for different time.

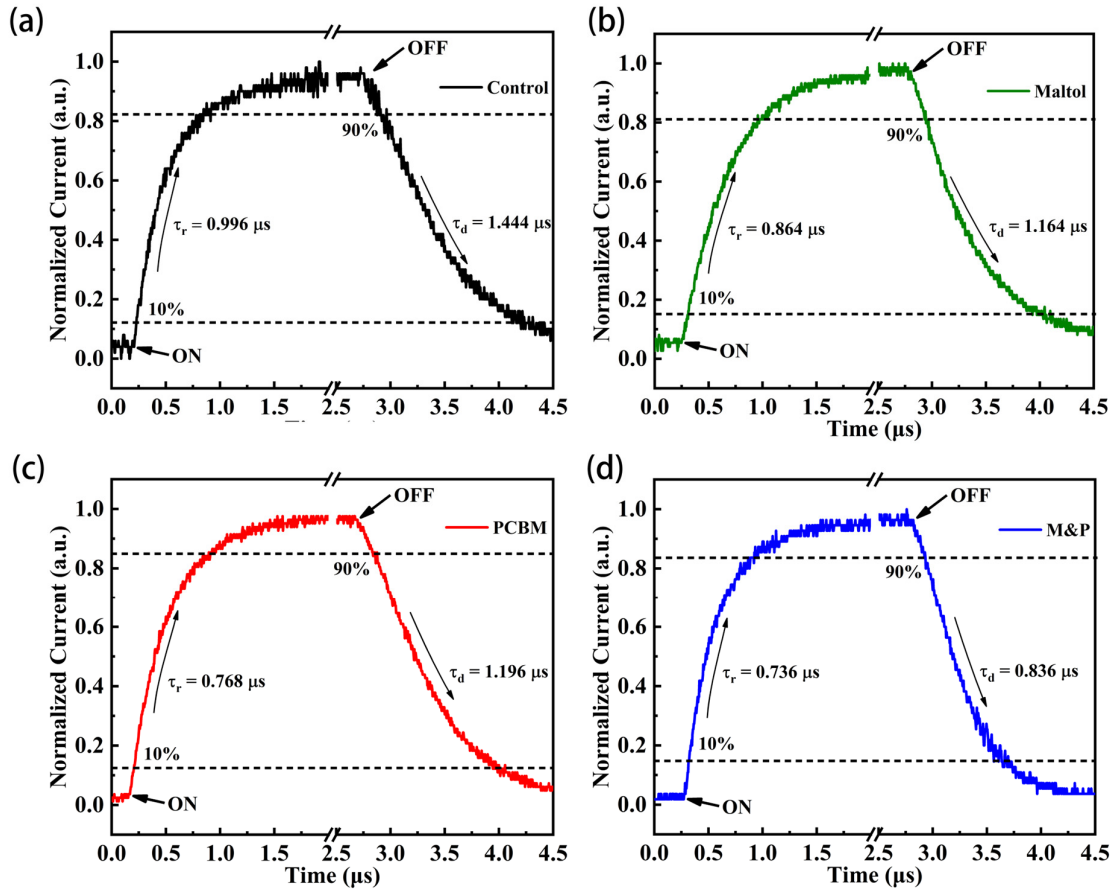

**Figure S11.** (a-d) Transient light response of the four different perovskite photodetectors.



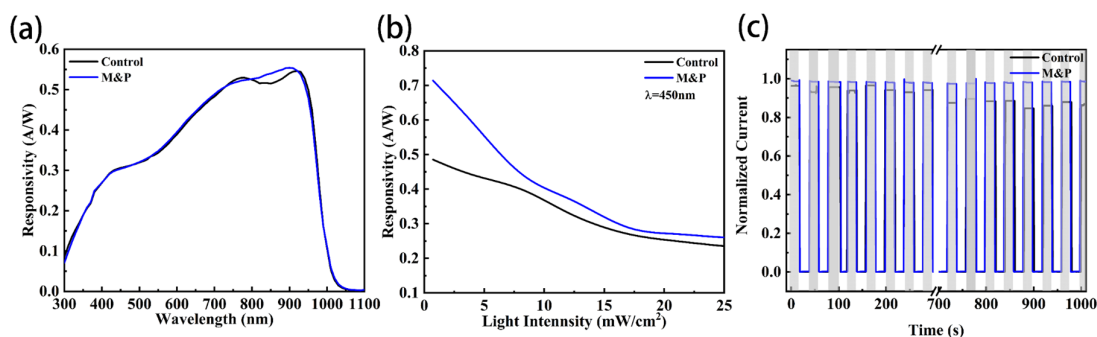

**Figure S12.** (a) Light intensity dependent responsivity. (b) normalized responsivity spectra. (c) Stability test of the normalized photocurrent response.

**Table S1.** Surface roughness of the four different structures (Control, PCBM, Maltol and M&P).

| Roughness (nm) | Control | Maltol | PCBM | M&P  |
|----------------|---------|--------|------|------|
| $R_q$          | 40.6    | 39.6   | 24.6 | 20.3 |
| $R_a$          | 32.6    | 30.7   | 19.4 | 15.3 |

**Table S2.** Rise time, decay time, and bandwidth of the four different perovskite photodetectors.

| Structure | $\tau_r(\mu s)$ | $\tau_d(\mu s)$ | bandwidth (KHz) |
|-----------|-----------------|-----------------|-----------------|
| Control   | 0.996           | 1.444           | 353             |
| Maltol    | 0.864           | 1.164           | 363             |
| PCBM      | 0.768           | 1.196           | 625             |
| M&P       | 0.736           | 0.836           | 636             |

**Table S3.** A performance comparison between the reported perovskite photodetectors and this work.

| Description                                                                                            | response time         | responsivity<br>(A/W) | bias(V) | $I_{dark}$ (A)         | references |
|--------------------------------------------------------------------------------------------------------|-----------------------|-----------------------|---------|------------------------|------------|
| MAPbI <sub>3-x</sub> Cl <sub>x</sub>                                                                   | 160 ns                |                       | 0       |                        | [1]        |
| MAPbI <sub>3</sub>                                                                                     | 120 ns                |                       | 0       |                        | [2]        |
| MAPbI <sub>3</sub>                                                                                     | 25.8 / 0.62 ms        |                       | 0.1     |                        | [3]        |
| MAPbI <sub>3</sub>                                                                                     | 12.7 / 6.9 $\mu s$    | 0.0637                | 0       |                        | [4]        |
| MAPbI <sub>3</sub>                                                                                     | 13.8 / 16.1 $\mu s$   | 0.1611                | 0       | $2 \times 10^{-14}$    | [5]        |
| MAPbBr <sub>3</sub>                                                                                    | 70 / 150 $\mu s$      | 0.002                 | 0       |                        | [6]        |
| MAPbI <sub>3</sub>                                                                                     | 460 / 940 ns          | 0.55                  | 0       |                        | [7]        |
| MAPbI <sub>3</sub>                                                                                     | 3 / 2.2 $\mu s$       |                       | 0       |                        | [8]        |
| MAPbI <sub>3</sub>                                                                                     | 1.2 / 3.2 $\mu s$     | 0.395                 | 0       |                        | [9]        |
| MAPbI <sub>3</sub>                                                                                     | 4.0 / 3.3 $\mu s$     | 0.314                 | 0       |                        | [10]       |
| (FASnI <sub>3</sub> ) <sub>0.6</sub> (MAPbI <sub>3</sub> ) <sub>0.37</sub><br>(MAPbBr) <sub>0.03</sub> | 0.736 / 0.836 $\mu s$ | 0.55428               | 0       | $7.31 \times 10^{-11}$ | This work  |

**Table S4.** A comparison of a single perovskite detector, four perovskite detectors in parallel and four perovskite detectors in parallel with inductors.

| Description                                          | Response time ( $\mu$ s) | Bandwidth (KHz) | Photocurrent ( $\mu$ A) |
|------------------------------------------------------|--------------------------|-----------------|-------------------------|
| a single perovskite detector                         | 0.74                     | 636             | 18.30                   |
| four perovskite detectors in parallel                | 2.80                     | 158             | 73.34                   |
| four perovskite detectors in parallel with inductors | 0.74                     | 598             | 69.87                   |

### Supplementary References

1. Dou, L.; Yang, Y.M.; You, J.; Hong, Z.; Chang, W.H.; Li, G.; Yang, Y. Solution-processed hybrid perovskite photodetectors with high detectivity. *Nat. Commun.* **2014**, *5*, 1-6.
2. Fang, Y. Huang, J. Resolving weak light of sub-picowatt per square centimeter by hybrid perovskite photodetectors enabled by noise reduction. *Adv. Mater.* **2015**, *27*, 2804-2810.
3. Pang, T.; Jia, R.; Wang, Y.; Sun, K.; Hu, Z.; Zhu, Y.; Luan, S.; Zhang, Y. Self-powered behavior based on the light-induced self-poling effect in perovskite-based transport layer-free photodetectors. *J. Mater. Chem. C* **2019**, *7*, 609-616.
4. Wang, J.; Xiao, S.; Qian, W.; Zhang, K.; Yu, J.; Xu, X.; Wang, G.; Zheng, S.; Yang, S. Self-driven perovskite narrowband photodetectors with tunable spectral responses. *Adv. Mater.* **2021**, *33*, 2005557.
5. Wu, C.Y.; Peng, W.; Fang, T.; Wang, B.; Xie, C.; Wang, Li.; Yang, W.H.; Luo, L.B. Asymmetric contact-induced self-driven perovskite-microwire-array photodetectors. *Adv. Electron. Mater.* **2019**, *5*, 1900135.
6. Shaikh, P.A.; Shi, D.; Retamal J. R. D.; Sheikh, A.D.; Haque, M.A.; Kang, C.F.; He, J.H.; Bakr, O.M.; Wu, T. Schottky junctions on perovskite single crystals: light-modulated dielectric constant and self-biased photodetection. *Adv. Electron. Mater.* **2016**, *4*, 8304-8312.
7. Tong, G.; Geng, X.; Yu, Y.; Yu, L.; Xu, J.; Jiang, Y.; Sheng, Y.; Shi, Y.; Chen, K. Rapid, stable and self-powered perovskite detectors via a fast chemical vapor deposition process. *RSC Adv.* **2017**, *7*, 18224-18230.
8. Tang, F.; Chen, Q.; Chen, L.; Ye, F.; Cai, J.; Chen, L. Mixture interlayer for high performance organic-inorganic perovskite photodetectors. *Appl. Phys. Lett.* **2016**, *109*, 123301.
9. Sutherland, B.R.; Johnston, A.K.; Ip, A.H.; Xu, J.; Adinolfi, V.; Kanjanaboos, P.; Sargent, E. Sensitive, fast, and stable perovskite photodetectors exploiting interface engineering. *ACS Photonics* **2015**, *2*, 1117-1123.
10. Bao, C.; Zhu, W.; Yang, J.; Li, F.; Gu, S.; Wang, Y.; Yu, T.; Zhu, J.; Zhou, Y.; Zou, Z. Highly flexible self-powered organolead trihalide perovskite photodetectors with gold nanowire networks as transparent electrodes. *ACS Appl. Mater. Interfaces* **2016**, *8*, 23868-23875.
